# Supplementary material for: Particulate organic matter in the Lena River and its delta: from the permafrost catchment to the Arctic Ocean
Source: Copernicus journal article supplement (doi:10.5194/bg-20-1423-2023), 2023-04-12
Supplement: Supplementary file 1 [file bg-20-1423-2023-supplement.pdf]

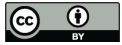

*Supplement of*

## **Particulate organic matter in the Lena River and its delta: from the permafrost catchment to the Arctic Ocean**

**Olga Ogneva et al.**

*Correspondence to:* Olga Ogneva (olga.ogneva@awi.de), Gesine Mollenhauer (gesine.mollenhauer@awi.de), and Jens Strauss (jens.strauss@awi.de)

The copyright of individual parts of the supplement might differ from the article licence.

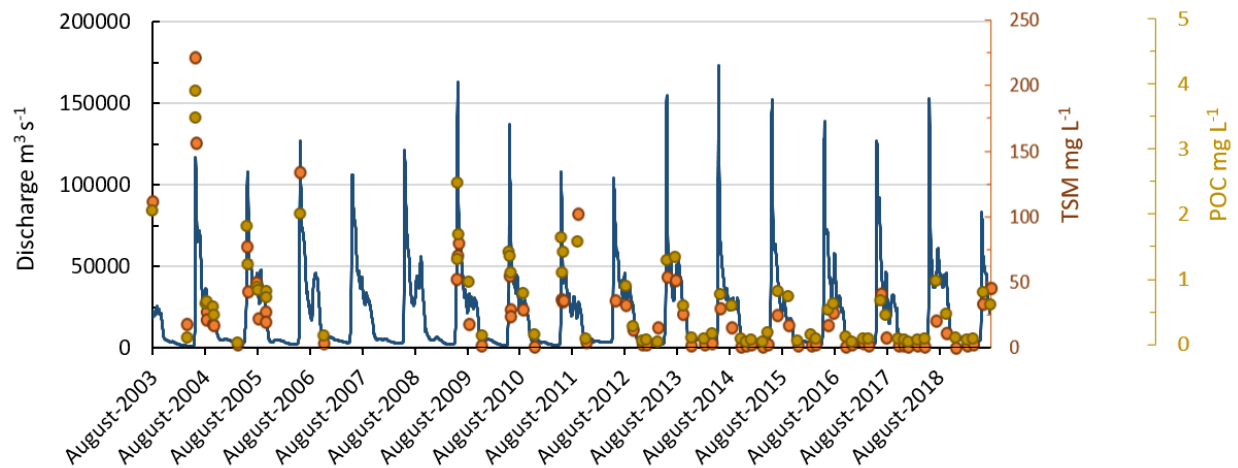

Figure S1: Time series of the Lena River discharge provided by ArcticGRO for 2003-2019 and TSM, POC concentration fluctuation.

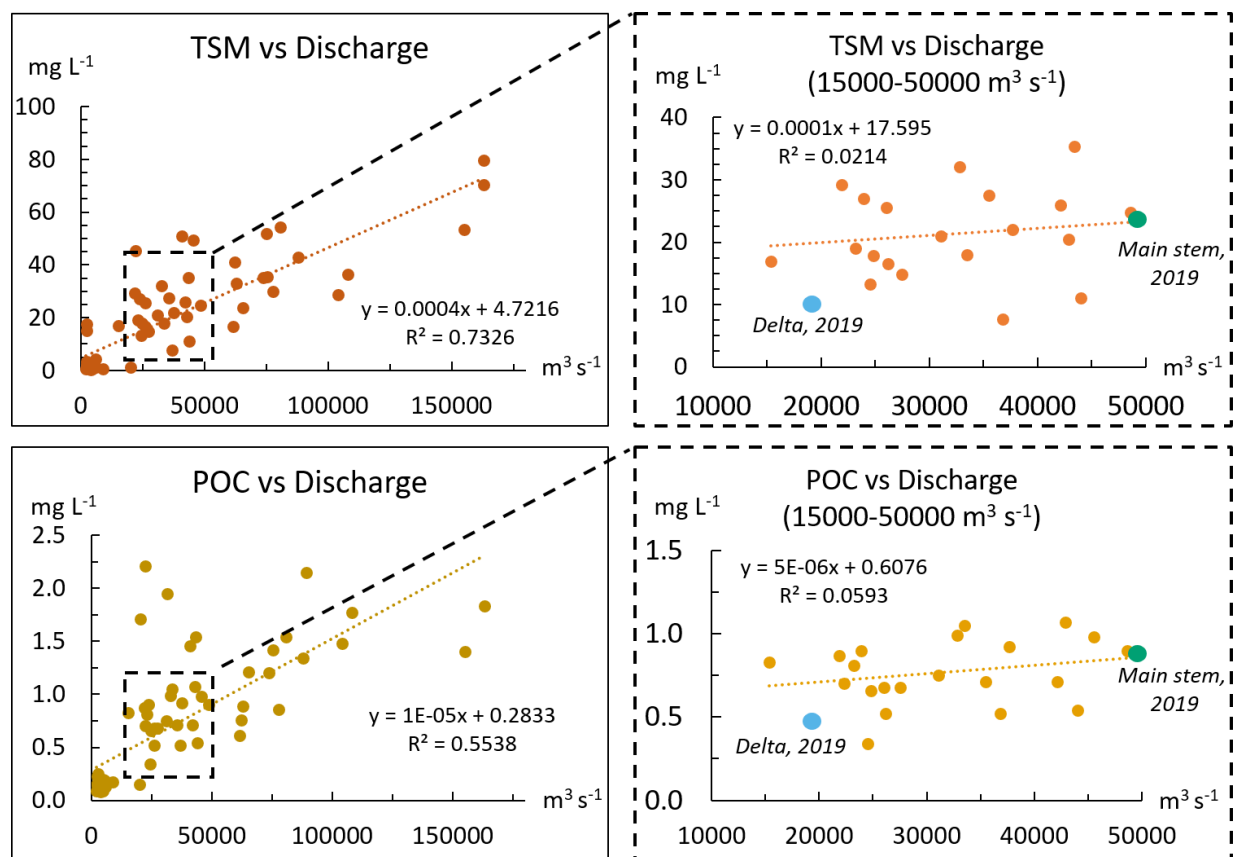

Figure S2: TSM, POC concentration (outliers were removed) and the Lena River discharge provided by ArcticGRO (left hand panels) and TSM and POC concentrations within the reduced range of the Lena River discharge including TSM and POC concentrations measured for this study in 2019 (right hand panels).

**Table S1.** Contribution of different OM sources to the composition of POC in the Lena River main stem and the Lena Delta.

| Sample ID     | Location  | I. Phytoplankton,<br>% | $\pm stdv$ | II. Holocene<br>Soils, % | $\pm stdv$  | III. Pleistocene<br>deposit, % | $\pm stdv$ |
|---------------|-----------|------------------------|------------|--------------------------|-------------|--------------------------------|------------|
| LEN19-S-01-1  | Stolb*    | 67.8                   | 7.8        | 16.8                     | 12.2        | 15.4                           | 4.5        |
| LEN19-S-01-9  | Stolb*    | 61.2                   | 7.9        | 18.8                     | 12.4        | 20.1                           | 4.5        |
| LEN19-S-02-1  | Delta     | 74.0                   | 5.3        | 10.2                     | 8.2         | 15.8                           | 3.1        |
| LEN19-S-02-16 | Delta     | 65.2                   | 7.7        | 18.1                     | 12.1        | 16.7                           | 4.5        |
| LEN19-S-03-1  | Delta     | 61.0                   | 7.9        | 17.6                     | 12.4        | 21.4                           | 4.6        |
| LEN19-S-04-1  | Delta     | 69.7                   | 4.6        | 8.7                      | 7.0         | 21.6                           | 2.6        |
| LEN19-S-05-1  | Delta     | 64.2                   | 7.3        | 15.9                     | 11.4        | 19.9                           | 4.2        |
| LEN19-S-06-1  | Delta     | 71.4                   | 7.4        | 17.2                     | 11.5        | 11.3                           | 4.3        |
| LEN19-S-06-6  | Delta     | 69.3                   | 5.6        | 11.2                     | 8.7         | 19.6                           | 3.3        |
| LEN19-S-07-1  | Delta     | 68.3                   | 5.4        | 10.5                     | 8.4         | 21.2                           | 3.1        |
| LEN19-S-07-15 | Delta     | 71.4                   | 4.7        | 9.3                      | 7.2         | 19.4                           | 2.7        |
| LEN19-S-78-1  | Delta     | 72.0                   | 4.7        | 8.7                      | 7.3         | 19.3                           | 2.8        |
| LEN19-S-08-1  | Delta     | 70.4                   | 5.4        | 10.2                     | 8.4         | 19.3                           | 3.1        |
| LEN19-S-08-6  | Delta     | 64.0                   | 9.0        | 25.6                     | 14.0        | 10.3                           | 5.1        |
| LEN19-S-89-1  | Delta     | 70.2                   | 6.5        | 13.2                     | 10.1        | 16.6                           | 3.8        |
| LEN19-S-89-6  | Delta     | 73.7                   | 5.3        | 10.2                     | 8.2         | 16.1                           | 3.1        |
| LEN19-S-89-12 | Delta     | 60.4                   | 5.6        | 11.4                     | 8.7         | 28.2                           | 3.2        |
| LEN19-S-09-1  | Delta     | 72.5                   | 5.7        | 11.2                     | 8.9         | 16.3                           | 3.3        |
| LEN19-S-09-5  | Delta     | 72.7                   | 5.1        | 10.2                     | 7.9         | 17.2                           | 3.0        |
| LEN19-S-09-10 | Delta     | 68.9                   | 6.4        | 13.4                     | 10.0        | 17.7                           | 3.7        |
| <b>MEAN</b>   |           | <b>68.4</b>            | <b>6.3</b> | <b>13.4</b>              | <b>9.7</b>  | <b>18.2</b>                    | <b>3.6</b> |
| WL19-01       | Main Stem | 40.8                   | 7.6        | 54.7                     | 11.6        | 4.5                            | 4.1        |
| WL19-02       | Main Stem | 42.7                   | 9.6        | 50.7                     | 14.9        | 6.6                            | 5.3        |
| WL19-03       | Main Stem | 35.4                   | 5.5        | 61.9                     | 8.1         | 2.7                            | 2.8        |
| WL19-04       | Main Stem | 46.0                   | 7.2        | 50.5                     | 11.0        | 3.5                            | 3.8        |
| WL19-05       | Main Stem | 45.4                   | 8.0        | 50.1                     | 12.3        | 4.6                            | 4.4        |
| WL19-06       | Main Stem | 37.4                   | 7.8        | 58.0                     | 12.0        | 4.6                            | 4.3        |
| WL19-07       | Main Stem | 41.8                   | 7.6        | 53.9                     | 11.6        | 4.3                            | 4.1        |
| WL19-0        | Main Stem | 30.8                   | 9.1        | 62.8                     | 14.0        | 6.4                            | 5.0        |
| WL19-09       | Main Stem | 34.0                   | 8.0        | 60.8                     | 12.3        | 5.3                            | 4.4        |
| <b>MEAN</b>   |           | <b>39.4</b>            | <b>7.8</b> | <b>55.9</b>              | <b>12.0</b> | <b>4.7</b>                     | <b>4.2</b> |

\*For this model samples from Stolb Island were included with the delta samples and contributed to the final mean  $\pm stdv$  values for potential POC sources
